# Supplementary material
Source: PubMed Central journal article supplement (PMC1906602)
Supplement: bmj_334_7608_1365__1.pdf [file bmj_334_7608_1365__1.pdf]

## Web only references

1. AA Foundation for Road Safety Research. The safety of older car drivers in the European Union. European Road Safety Federation. 1997.
2. Martin A, Balding L, O'Neill D. A bad press: older drivers and the media. *British Medical Journal* 2005; 330: 368.
3. McGwin G, Sims RV, Pulley L, Roseman JM. Relations among chronic medical conditions, medications, and automobile crashes in the elderly: a population-based case-control study. *American Journal of Epidemiology* 2000; 152: 424-31.
4. Langford J, Methorst R, Hakamies-Blomqvist L. Older drivers do not have a high crash risk – a replication of low mileage bias. *Accident; Analysis and Prevention* 2006; 38: 574-8.
5. Hakamies-Blomqvist L, Raitanen T, O'Neill D. Driver ageing does not cause higher accident rates per km. *Transportation Research Part F, Traffic Psychology and Behaviour* 2002; 5: 271-4.
6. Burkhardt JE, McGavock AT. Tomorrow's older drivers: Who? How many? What impacts? *Transportation Research Record* 1999; 78: 62-70.
7. Hakamies-Blomqvist L, Wiklund M, Henriksson P. Predicting older drivers' accident involvement: Smeed's law revisited. *Accident; Analysis and Prevention* 2005; 37: 675–680.
8. Brayne C, Dufouil C, Ahmed A, Dening TR, Chi LY, McGee M, *et al.* Very old drivers: findings from a population cohort of people aged 84 and over. *International Journal of Epidemiology* 2000; 29: 704-7.
9. Vernon DD, Diller EM, Cook LJ, Reading JC, Suruda AJ, Dean JM. Evaluating the crash and citation rates of Utah drivers licensed with medical conditions, 1992-1996. *Accident; Analysis and Prevention* 2002; 34: 237-46.
10. O'Neill D, Neubauer K, Boyle M, Gerrard J, Surmon D, Wilcock GK. Dementia and driving. *Journal of the Royal Society of Medicine* 1992; 85: 199-202.
11. Taylor BD, Tripodes S. The effects of driving cessation on the elderly with dementia and their caregivers. *Accident; Analysis and Prevention* 2001; 33: 519-28.
12. Freeman EE, Grange SJ, Munoz B, West SK. Driving status and risk of entry into long-term care in older adults. *American Journal of Public Health* 2006; 96: 1254-9.
13. Langford J, Methorst R, Hakamies-Blomqvist L. Older drivers do not have a high crash risk – a replication of low mileage bias. *Accident; Analysis and Prevention* 2006; 38: 574-8.
14. Kalimo H, Wirbled M. Alzheimer's disease and apolipoprotein E epsilon 4 allele in older drivers who died in automobile accidents. *Lancet* 1997; 349: 1143-4.
15. Lundberg C, Johansson K. Follow-up of Alzheimer's disease and apolipoprotein E epsilon 4 allele in older drivers who died in automobile accidents. In: *The older driver, Health and Mobility* (O'Neill D, ed). Dublin: ARHC Press. 1999.
16. de Simone V, Kaplan L, Patronas N, Wassermann EM, Grafman J. Driving abilities in frontotemporal dementia patients. *Dementia and Geriatric Cognitive Disorders* 2007; 23: 1-7.
17. Wise MEJ, Watson JP. Postal survey of psychiatrist's knowledge and attitudes towards driving and mental illness. *Psychiatric Bulletin* 2001; 25: 345-9.
18. Thompson P, Nelson D. DVLA regulations concerning driving and psychiatric disorders: knowledge and attitudes of psychiatrists. *Psychiatric Bulletin* 1996; 20: 323-5.
19. Rabbitt P, Carmichael A, Jones S, Holland C. When and why older drivers give up driving. Basingstoke, AA Foundation of Road Safety Research, 1996.
20. Carr DB, Gray S, Baty J, Morris JC. The value of informant versus individual's complaints of memory impairment in early dementia. *Neurology* 2000; 55: 1724-6.
21. Cacchione PZ, Powlishta KK, Grant EA, Buckles VD, Morris JC. Accuracy of collateral source reports in very mild to mild dementia of Alzheimer type. *Journal of the American Geriatrics Society* 2003; 51: 819.

22. Hermann N, Rapoport MJ, Sambrook R, Hebert R, McCracken, Robillard A, *et al.* Predictors of driving cessation in mild-to-moderate dementia. *Canadian Medical Association Journal* 2006; 175: 591-5.
23. Naides A, McKeith IG. Driving, dementia, and the Driver and Vehicle Licensing Agency: a survey of old age psychiatrists. *Psychiatric Bulletin* 2006; 30: 265-8.
24. Odenheimer GL, Beaudet M, Jette AM, Albert MS, Grande L, Minaker KL. Performance-based driving evaluation of the elderly driver: safety, reliability, and validity. *Journal of Gerontology* 1994; 49: 153-9.
25. Fox GK, Bowden SC, Bashford GM, Smith DS. Alzheimer's disease and driving: prediction and assessment of driving performance. *Journal of the American Geriatric Society* 1997; 45: 949-53.
26. Rizzo M, Reinach S, McGehee D, Dawson J. Simulated car crashes and crash predictors on drivers with Alzheimer's disease. *Archives of Neurology* 1997; 54: 545-51.
27. Reason JT, Brand JJ. Motion sickness. London, Academic Press, 1975.
28. Ranney TA. Models of driving behaviour: a review of their evolution. *Accident; Analysis and Prevention* 1994; 26: 733-50.
29. Fuller R. Towards a general theory of driver behaviour. *Accident; Analysis and Prevention* 2005; 37: 461-72.
30. Dubinsky RM, Stein AC, Lyons K. Practice parameter: Risk of driving and Alzheimer's disease (an evidence-based review): report of the quality standards subcommittee of the American Academy of Neurology. *Neurology* 2000; 54: 2205-11.
31. Eadington DW, Frier BM. Type 1 diabetes and driving experience: an eight-year cohort study. *Diabetes Medicine* 1988; 6: 137-41.
32. Editorial. Driving and Parkinson's disease. *Lancet* 1990; 336: 781.
33. Hansotia P, Broste SK. The effect of epilepsy or diabetes mellitus on the risk of automobile accidents. *New England Journal of Medicine* 1991; 324: 22-6.
34. Waller JA. Health status and motor vehicle crashes. *New England Journal of Medicine* 1991; 324: 54-55.
35. Tay R. Ageing drivers: storm in a teacup? *Accident; Analysis and Prevention* 2006; 38: 112-21.
36. Grabowski DC, Campbell CM, Morrisey MA. Elderly licensure laws and motor vehicle fatalities. *Journal of the American Medical Association* 2004; 291: 2840-6.
37. Molnar FJ, Eby DW. A brief look at driver license renewal policies in the United States. *Public Policy and Aging Report* 2005; 15: 13-17.
38. House of Lords Science and Technology Committee. Ageing: scientific aspects. Second follow-up report: report with evidence. London, Stationery Office, 2006.
